# Supplementary material for: TB Hackathon: Development and Comparison of Five Models to Predict Subnational Tuberculosis Prevalence in Pakistan
Source: Trop Med Infect Dis. 2022 Jan 17;7(1):13. doi: 10.3390/tropicalmed7010013 (PMC8780063; doi:10.3390/tropicalmed7010013)
Supplement: Supplementary file 1 [file tropicalmed-07-00013-s001.zip › Table S2.xls]

## Sheet: Sheet1
fid	adm_uid	province	district	M1_mid	M1_lo	M1_hi	M2_mid	M2_lo	M2_hi	M3_mid	M3_lo	M3_hi	M4_mid	M4_lo	M4_hi	M5_mid	M5_lo	M5_hi
129			FR Lakki Marwat	355.205	0	999.288
127			FR Peshawar	274.641	0	814.151
131			FR Tank	453.957	0	1316.48
130			Lehri	2019.66	0	9519.14
126			Sohbatpur	1136.85	0	4555.09
128			Sujawal	355.382	0	1177.66
1	701	Balochistan	Awaran	2538.74	0	8693.31	439.271	347.184	573.402	116.25	8.09	1936.41	347	252	443	289	23	1015
2	702	Balochistan	Barkhan	279.763	0	635.047	509.792	383.811	689.142	262.88	31.13	2672.36	406	333	478	289	23	1015
3	704	Balochistan	Chagai	322.291	0	753.412	410.587	313.801	523.539	236.03	13.31	3750.13	881	801	960	289	23	1015
5	705	Balochistan	Dera Bugti	4973.61	0	20673	480.728	368.621	643.618	339.7	75.99	2197.81	8	-12	28	211	167	253
4	706	Balochistan	Gwadar	1148.53	0	3819.95	398.001	315.064	500.481	171.53	13.1	2507.75				289	23	1015
6	707	Balochistan	Harnai	337.746	0	821.193	475.92	365.525	633.113	207.16	38.69	1335	749	585	912	289	23	1015
7	708	Balochistan	Jaffarabad	363.112	0	1359.31	412.593	329.088	524.541	102.27	41.6	301.96				289	23	1015
8	709	Balochistan	Jhal Magsi	718.087	0	1902.16	520.075	389.704	707.446	138.29	20.86	1082.43	273	180	365	906	767	1045
9	711	Balochistan	Kachhi	407.712	0	987.953	522.653	388.729	716.137	130.96	20.08	888.33	498	491	506	906	767	1045
12	710	Balochistan	Kalat	740.833	0	1774.64	400.444	320.26	503.606	158.12	18.88	1498.56	491	351	631	610	467	751
10	712	Balochistan	Kech	940.058	0	2842.95	310.345	255.461	377.81	169.44	16.77	2230.87	420	333	506	44	2	85
13	713	Balochistan	Kharan	3274.54	0	11920.3	370	299.574	450.619	135.56	13.58	1272.43	345	254	436	289	23	1015
11	714	Balochistan	Khuzdar	1299.21	0	4245.73	497.293	376.999	667.645	130.59	14.11	1194.6	604	561	648	44	2	85
14	715	Balochistan	Killa Abdullah	356.691	0	982.74	327.206	265.87	401.599	217.9	70.98	1175.44	422	264	581	256	95	730
15	716	Balochistan	Killa Saifullah	7424.78	0	24345.1	389.006	312.187	487.649	265.71	44.89	2390.2	437	390	485	610	467	751
17	717	Balochistan	Kohlu	3088.78	0	11740.5	578.909	414.314	810.523	263.36	28.34	2780.6	176	102	251	289	23	1015
16	718	Balochistan	Las Bela	378.525	0	930.782	474.949	362.844	632.852	63.63	18.91	257.13	255	139	371	289	23	1015
18	719	Balochistan	Loralai	1465.54	0	3617.89	395.784	314.388	495.813	205.08	35.53	1483.77	487	441	533	610	467	751
19	720	Balochistan	Mastung	1123.98	0	3452.09	404.721	316.501	515.38	176.04	54.66	588.2	424	338	510	289	23	1015
21	721	Balochistan	Musakhel	274.345	0	627.905	608.902	428.733	856.177	233.83	32.39	2406	763	644	881	289	23	1015
22	722	Balochistan	Nasirabad	625.26	0	1933.14	442.46	349.589	578.053	154.87	44.32	744.74	367	318	417	256	95	730
23	723	Balochistan	Nushki	295.12	0	662.868	382.487	306.512	472.068	122.89	9.74	1542.29	277	204	350	289	23	1015
24	724	Balochistan	Panjgur	314.305	0	743.569	334.235	273.009	400.21	171.51	17.14	2320.34	367	290	444	289	23	1015
20	725	Balochistan	Pishin	797.935	0	2186.8	275.969	221.838	333.127	139.4	45.61	489	331	301	360	256	95	730
122	703	Balochistan	Quetta	723.443	0	2971.49	441.8	337.454	576.49	143.5	60.6	379.02	444	413	476	289	23	1015
26	727	Balochistan	Sheerani	3162.85	0	8913.08	469.156	364.163	623.423	305.63	23.89	5020.74				289	23	1015
25	728	Balochistan	Sibi	717.638	0	2110.89	581.204	415.391	815.789	151.71	29.36	891.94	413	350	476	211	167	253
27	729	Balochistan	Washuk	1706.15	0	5977.35	430.04	339.781	557.971	131.24	9.77	2134.88	621	517	724	289	23	1015
28	730	Balochistan	Zhob	2887.38	0	8824.47	456.789	350.396	600.601	233.39	18.91	3582.61	284	255	313
29	731	Balochistan	Ziarat	293.941	0	670.068	352.327	285.734	427.623	176.57	44.26	845.84	269	157	381	289	23	1015
31	501	Federal Capital Territory	Islamabad	362.667	0	809.66	413.927	326.995	528.125	127.65	51.38	221.28				473	95	745
32	401	Federally Administered Tribal Area	Bajaur Agency	566.054	0	1372.71	351.664	148.227	729.419	214.23	29.65	1631.83				270	11	945
124	408	Federally Administered Tribal Area	Frontier region Bannu	1165.97	0	3537.16	545.255	241.41	965.517	135.11	24.85	1158.31
125	409	Federally Administered Tribal Area	Frontier region Dera Ismail Khan	349.85	0	811.101	712.531	322.271	1200.39	246.82	37	2358.13
123	410	Federally Administered Tribal Area	Frontier region Kohat	257.012	0	632.439	473.904	213.857	855.204	84.43	24.58	354.01
33	402	Federally Administered Tribal Area	Khyber Agency	505.999	0	1402.23	404.802	172.876	787.458	199	35.19	2774.28				366	101	1101
34	403	Federally Administered Tribal Area	Kurram Agency	1142.33	0	3083.64	381.51	164.951	750.361	167.71	19.35	2395.79				366	101	1101
117	404	Federally Administered Tribal Area	Mohmand Agency	3794.88	0	12641.7	429.248	168.724	915.978	156	26.14	1266.2				384	97	981
118	405	Federally Administered Tribal Area	North Waziristan Agency	565.59	0	1535.6	561.587	232.635	1027.62	210.31	33.23	2047.44	416	382	449	366	101	1101
119	406	Federally Administered Tribal Area	Orakzai Agency	3257.97	0	8785.09	412.806	183.468	789.432	151.12	26.08	1424.08				384	97	981
120	407	Federally Administered Tribal Area	South Waziristan Agency	1165.19	0	3414.81	623.29	261.78	1104.5	311.31	39.69	3208.83				366	101	1101
139		Federally Administered Tribal Area	fr tank													576	178	750
35	101	Gilgit Baltistan	Astore				414.027	327.05	528.308	141.4	28.86	874.51				576	178	750
37	103	Gilgit Baltistan	Diamir				413.971	327.014	528.207	231.86	34.34	2591.67				576	178	750
38	104	Gilgit Baltistan	Ghanche				413.954	327.01	528.175	158.39	6.99	3365.31				289	23	1015
39	105	Gilgit Baltistan	Ghizer				414.621	327.425	529.421	271.5	17.49	4621				289	23	1015
40	106	Gilgit Baltistan	Gilgit				413.966	327.014	528.197	113.63	10.56	1198.59				576	178	750
41	107	Gilgit Baltistan	Hunza Nagar				413.993	327.03	528.247	149.47	9	2573.93				289	23	1015
42	102	Gilgit Baltistan	Skardu				413.988	327.028	528.238	139.61	11.09	2013.73				289	23	1015
43	0	India-administered Kashmir	India-administered Kashmir				413.971	327.017	528.206
36	201	Khyber Pakhtunkhwa	Abbottabad	552.888	0	1201.51	525.345	237.335	936.007	436.31	212.01	897.44	550	401	699	165	91	449
30		Khyber Pakhtunkhwa	Bannu													318	26	1012
30	202	Khyber Pakhtunkhwa	Bannu	410.842	0	1154.31	655.094	283.932	1146.51	126.34	33.51	585.65	646	620	672
35	203	Khyber Pakhtunkhwa	Batagram	816.016	0	2564.87	580.743	244.889	1078.99	454.02	110.47	2640.41				289	23	1015
37	204	Khyber Pakhtunkhwa	Buner	588.685	0	1699.87	395.685	181.933	741.545	307.29	111.43	1227.63				289	23	1015
39	205	Khyber Pakhtunkhwa	Charsadda	164.107	0	343.502	438.669	178.369	890.9	52.83	25.78	135.96				165	91	449
40	206	Khyber Pakhtunkhwa	Chitral	1286.38	0	2877.69	505.765	196.502	1069.77	386.08	25.85	5792.64	353	320	386	289	23	1015
41	207	Khyber Pakhtunkhwa	Dera Ismail Khan	585.15	0	1403.7	1301.98	668.098	2461.07	220.62	79.29	687.94	531	505	557	510	173	1116
38	208	Khyber Pakhtunkhwa	Hangu	313.805	0	742.859	351.69	172.719	617.976	75.11	22.47	269.75	360	329	391	609	270	1031
44	209	Khyber Pakhtunkhwa	Haripur	277.947	0	720.197	538.088	239.374	995.86	210.71	126.89	372.66	443	296	590	610	467	751
42	210	Khyber Pakhtunkhwa	Karak	829.765	0	2635.32	542.514	268.302	869.736	125.89	29.7	593.17	416	263	570	610	467	751
45	211	Khyber Pakhtunkhwa	Kohat	138.494	0	356.925	546.565	253.122	940.565	103.04	33.59	290.8	153	86	220	323	95	730
46	212	Khyber Pakhtunkhwa	Kohistan	302.603	0	669.839	605.048	229.2	1230.49	356.65	32.12	5344.03				289	23	1015
47	213	Khyber Pakhtunkhwa	Lakki Marwat	317.139	0	917.307	761.682	371.726	1277.28	172.86	40.36	928.45	429	401	457	906	767	1045
43	214	Khyber Pakhtunkhwa	Lower Dir	333.712	0	772.856	316.973	137.374	624.508	223.51	37.02	1387.67	405	379	431	256	170	449
49	215	Khyber Pakhtunkhwa	Malakand	335.135	0	1015.17	380.074	159.882	758.009	121.99	44.36	350.41	520	486	555	270	11	945
50	216	Khyber Pakhtunkhwa	Mansehra	576.795	0	1901.05	555.835	257.454	997.754	426.43	219.8	1071.66	513	353	673	906	767	1045
51	217	Khyber Pakhtunkhwa	Mardan	260.149	0	602.881	429.899	181.179	836.487	111.52	59.71	237.44	315	181	449	165	91	449
52	218	Khyber Pakhtunkhwa	Nowshera	104.058	0	222.269	469.09	197.168	883.368	62.91	28.46	130.62	76	5	147	165	91	449
53	219	Khyber Pakhtunkhwa	Peshawar	123.679	0	269.595	433.867	179.782	843.573	51.32	19.23	145.22	0			289	23	1015
54	220	Khyber Pakhtunkhwa	Shangla	1324.23	0	3519.4	482.878	203.72	919.995	313.34	51.62	2627.59				289	23	1015
55	221	Khyber Pakhtunkhwa	Swabi	199.33	0	500.921	483.655	211.276	913.009	141.49	84.72	253.86	524	501	547	357	8	1002
57	222	Khyber Pakhtunkhwa	Swat	307.641	0	747.1	364.986	156.208	713.768	259.02	35.84	2373.45	395	375	416	289	23	1015
56	229	Khyber Pakhtunkhwa	Tank	377.273	0	965.875	804.43	376.897	1379.73	190.9	53.74	896.92	427	385	469	906	767	1045
48	231	Khyber Pakhtunkhwa	Tor Ghar	4496.41	0	16243.6	537.312	261.682	1027.73	403.65	88.42	2623.72
58	230	Khyber Pakhtunkhwa	Upper Dir	1823.27	0	6622.95	365.754	154.181	746.756	322.09	30.15	4181.03	236	202	269	906	767	1045
29		Khyber Pakhtunkhwa	bannu													610	467	751
71	301	Pakistan-administered Kashmir	Bagh				414.008	327.04	528.274	149.66	59.52	366.56				270	11	945
58	302	Pakistan-administered Kashmir	Bhimber				413.565	326.885	527.412	178.31	55.58	540.38				384	97	981
61	303	Pakistan-administered Kashmir	Hattian				413.981	327.024	528.224	242.01	94.58	739.46
75	304	Pakistan-administered Kashmir	Haveli				413.911	326.98	528.096	134.77	43.34	463.6				384	97	981
138		Pakistan-administered Kashmir	Jhelum Valley													384	97	981
63	305	Pakistan-administered Kashmir	Kotli				413.982	327.023	528.227	108.6	40.42	306.39				384	97	981
138	306	Pakistan-administered Kashmir	Mirpur				418.214	329.978	535.808	81.2	28.3	196.36	316	276	356	384	97	981
66	307	Pakistan-administered Kashmir	Muzaffarabad				413.981	327.022	528.225	280.56	161.8	626.55				384	97	981
72	308	Pakistan-administered Kashmir	Neelum				414.035	327.056	528.322	202.13	83.46	676.03				366	101	1101
73	309	Pakistan-administered Kashmir	Poonch				413.981	327.023	528.224	137.73	55	320.51				270	11	945
74	310	Pakistan-administered Kashmir	Sudhnoti				414.003	327.036	528.265	108.39	50.71	228.6				270	11	945
59	601	Punjab	Attock	258.363	0	580.081	419.96	332.261	537.672	136.36	65.77	267.59	144	73	214	510	173	1116
62	602	Punjab	Bahawalnagar	435.398	0	1035.36	439.817	343.624	575.771	348.53	155.92	952.74	400	262	538	609	270	1031
63	603	Punjab	Bahawalpur	265.296	0	594.796	443.095	343.131	579.743	218.45	93.31	847.7				211	167	253
60	604	Punjab	Bhakkar	486.913	0	1252.42	423.174	333.728	544.966	186.37	92.31	452.53	478	457	499	906	767	1045
64	605	Punjab	Chakwal	766.963	0	1665.29	384.017	308.265	474.405	127.54	54.19	298.1	409	388	430	609	270	1031
65	606	Punjab	Chiniot	315.26	0	727.194	508.072	382.717	684.386	99.54	52.74	169.77	97	33	161	188	7	252
66	607	Punjab	Dera Ghazi Khan	376.552	0	1059.82	414.125	326.899	528.679	208.99	95.97	639.58	193	112	273	256	95	730
68	608	Punjab	Faisalabad	198.37	0	487.465	417.274	327.195	536.272	115.43	65.92	203.36	152	87	216	86	4	251
69	609	Punjab	Gujranwala	171.113	0	398.25	366.175	290.417	447.122	158.85	72.84	308.75	193	118	268	289	23	1015
70	610	Punjab	Gujrat	176.566	0	372.7	413.691	330.691	526.469	128.42	46.8	215.92	0			188	7	252
72	611	Punjab	Hafizabad	526.221	0	1559.27	407.963	322.435	518.117	109.95	59.25	211.86	184	107	261	188	7	252
71	612	Punjab	Jhang	233.281	0	587.908	468.661	361.827	623.152	148.6	49.59	535.22	454	326	581	323	95	730
74	613	Punjab	Jhelum	355.579	0	794.611	416.585	331.633	531.359	144.28	74.03	275.53	416	279	554	323	95	730
73	614	Punjab	Kasur	182.554	0	423.105	394.256	311.587	493.549	140.7	63.88	330	104	42	166	165	91	449
75	615	Punjab	Khanewal	416.272	0	980.977	415.599	327.728	531.457	190.26	91.35	416.65	401	247	556	357	8	1002
76	616	Punjab	Khushab	420.994	0	961.778	422.283	335.825	538.701	275.09	131.21	554.19	492	345	638	510	173	1116
77	617	Punjab	Lahore	201.917	0	491.346	395.155	309.181	495.623	60.22	21.03	148.63				126	89	164
79	618	Punjab	Layyah	541.05	0	1621.3	396.154	315.483	496.268	214.99	109.45	553.6	374	353	395	609	270	1031
78	619	Punjab	Lodhran	328.626	0	769.622	414.814	326.985	530.031	88.2	36.49	236.41	405	258	552	256	170	449
82	620	Punjab	Mandi Bahauddin	505.679	0	1311.07	453.811	356.219	597.129	174.33	76.47	370.63				357	8	1002
80	621	Punjab	Mianwali	379.974	0	1371.99	408.361	327.093	516.987	160.54	41.71	688.52	66	5	126	609	270	1031
83	622	Punjab	Multan	214.403	0	502.311	396.929	312.052	498.675	140.93	60.94	333.97	152	75	228	188	7	252
84	623	Punjab	Muzaffargarh	287.401	0	748.782	384.914	307.05	476.71	162.96	94.56	403.06				357	8	1002
85	624	Punjab	Nankana Sahib	538.296	0	1613.14	414.408	327.156	529.068	146	92.23	225.41				357	8	1002
87	625	Punjab	Narowal	286.922	0	680.877	354.719	288.481	429.189	146.12	65.93	340.81	110	44	176	256	170	449
89	626	Punjab	Okara	470.272	0	1152.25	443.074	344.126	579.877	226.42	118.77	447.39	455	321	590	165	91	449
90	627	Punjab	Pakpattan	480.12	0	1475.28	431.606	338.705	560.443	269.18	133.07	603.43				357	8	1002
91	628	Punjab	Rahim Yar Khan	257.974	0	592.596	429.869	337.159	557.337	126.07	63.26	374.55	161	87	235	609	270	1031
92	629	Punjab	Rajanpur	785.31	0	2080.86	456.178	352.583	601.274	183.93	83.32	716.43				256	95	730
94	630	Punjab	Rawalpindi	251.194	0	557.085	418.383	329.289	537.133	120.62	63.41	200.9	247	171	322	211	167	253
96	631	Punjab	Sahiwal	227.596	0	564.776	438.408	343.407	572.906	195.97	100.68	379.65	308	190	427	357	8	1002
97	632	Punjab	Sargodha	244.06	0	597.608	438.587	344.798	572.967	208.66	98.51	429.04	356	231	482	165	91	449
98	633	Punjab	Sheikhupura	191.96	0	454.787	366.395	290.233	448.068	108.26	55.2	206.74	143	87	199	188	7	252
100	634	Punjab	Sialkot	276.558	0	624.959	386.21	310.036	478.91	253.31	112.37	511.33	319	176	463	610	467	751
99	635	Punjab	Toba Tek Singh	164.642	0	454.792	430.053	339.849	556.983	131.4	48.47	323.89	0			357	8	1002
101	636	Punjab	Vehari	250.422	0	557.469	422.5	332.77	543.723	107.19	67.95	180.9	400	248	553	357	8	1002
102	801	Sindh	Badin	337.361	0	993.352	1017.26	616.78	1634.01	376.02	155.3	1616.68	156	68	243	609	270	1031
103	802	Sindh	Dadu	515.199	0	1430.24	770.487	502.192	1150.68	125.62	52.44	506.73	597	443	751	510	173	1116
61	803	Sindh	Ghotki	328.192	0	922.328	722.125	493.958	1033.09	157.3	63.09	527.21	247	129	366	510	173	1116
106	804	Sindh	Hyderabad	261.58	0	596.777	649.827	446.88	920.456	237.75	114.27	518.56	355	214	496	211	167	253
67	805	Sindh	Jacobabad	186.722	0	411.32	616.32	456.123	863.76	123.83	51.45	400.41	92	38	147	323	95	730
104	806	Sindh	Jamshoro	784.782	0	1933.47	778.742	517.108	1142.21	231.35	87.21	933.45	560	543	576	211	167	253
107	807	Sindh	Karachi City	255.492	0	605.103	601.687	421.184	805.549	85.29	39.66	146.69				211	167	253
108	808	Sindh	Kashmore	189.075	0	423.309	598.105	433.943	813.68	203.95	90.22	639.69				323	95	730
109	809	Sindh	Khairpur	138.373	0	294.527	735.805	479.35	1087.51	150.59	53.11	571.69	71	9	133	211	167	253
81	810	Sindh	Larkana	491.525	0	1248.74	607.361	427.384	862.064	111.86	53.99	254.63	554	533	574	86	4	251
86	811	Sindh	Matiari	429.593	0	998.965	762.928	488.272	1140.57	279.75	110.38	860.3	585	551	619	165	91	449
88	812	Sindh	Mirpur Khas	345.22	0	755.826	725.858	494.238	1048.14	435.79	229.96	1085.13	58	-17	133	323	95	730
113	813	Sindh	Naushahro Feroze	287.788	0	628.426	686.083	463.598	987.346	131.25	44.21	382.13	124	55	192	165	91	449
93	815	Sindh	Qambar Shahdadkot	224.992	0	565.577	799.84	521.738	1205.76	138.1	52.12	541.56				510	173	1116
111	814	Sindh	Sanghar	366.351	0	867.698	825.57	529.951	1246.62	323.72	138.67	992.55	391	241	541	510	173	1116
112	816	Sindh	Shaheed Benazirabad	251.949	0	586.852	681.398	456.229	987.103	182.78	31.33	1337.55	1000	1000	1000	165	91	251
95	817	Sindh	Shikarpur	453.701	0	1479.97	676.587	478.048	968.366	115.04	52.45	336.86	656	627	685	323	95	730
105	818	Sindh	Sukkur	151.062	0	357.011	681.412	473.135	950.474	109.33	40.55	330.83	130	64	196	126	89	164
114	819	Sindh	Tando Allah Yar	545.742	0	1360.04	723.037	479.799	1051.31	278.79	158.76	766.42				165	91	251
110	820	Sindh	Tando Muhammad Khan	561.383	0	1440.43	799.392	537.896	1173.1	282.57	167.37	622.5				609	270	1031
115	821	Sindh	Tharparkar	722.873	0	2614.77	2050.8	832.474	4070.27	455.77	62.45	4393.95	688	661	715
116	822	Sindh	Thatta	438.992	0	1153.66	849.115	566.68	1258.84	448.92	118.23	3298.4	698	675	721	256	95	730
121	823	Sindh	Umerkot	531.793	0	1528.79	999.77	603.505	1596.58	416.35	195.83	1071.57				510	173	1116
137		Sindh	sujawal													906	767	1045
