# Supplementary material for: TB Hackathon: Development and Comparison of Five Models to Predict Subnational Tuberculosis Prevalence in Pakistan
Source: Trop Med Infect Dis. 2022 Jan 17;7(1):13. doi: 10.3390/tropicalmed7010013 (PMC8780063; doi:10.3390/tropicalmed7010013)
Supplement: Supplementary file 1 [file tropicalmed-07-00013-s001.zip › Table S3.xlsx]

## Sheet: Sheet1
CNR/Prevalence Quantile Rank	Province	District	Population	Bact+ notified (2018)	Bact+ CNR (2018)		Estimated Bact+ Prevalence rate (2018)						Quantile rank of CNR over estimated prevalence rate
							Model 1	Model 2	Model 3	Model 4	Model 5		Model 1	Model 2	Model 3	Model 4	Model 5
First quantile	GILGIT BALTISTAN	GHIZER	133828	22	16.439			414.621	271.5		289			0.097	0.02		0.097
	GILGIT BALTISTAN	GHANCHE	93540.9	10	10.6905			413.954	158.39		289			0.02	0.041		0.029
	FATA	SOUTH WAZIRISTAN AGENCY	541391	133	24.5663		1165.19	623.29	311.31		366		0.11	0.09	0.055		0.149
	FATA	MOHMAND AGENCY	449744	87	19.3443		3794.88	429.248	156		384		0.007	0.111	0.166		0.067
	FATA	KURRAM AGENCY	602500	128	21.2448		1142.33	381.51	167.71		366		0.094	0.166	0.173		0.111
	FATA	NORTH WAZIRISTAN AGENCY	474151	103	21.723		565.59	561.587	210.31	416	366		0.165	0.083	0.118	0.097	0.119
	BALOCHISTAN	KACHHI(BOLAN)	225915	8	3.54116		407.712	522.653	130.96	498	906		0.039	0	0	0	0
	BALOCHISTAN	MUSA KHEL	148755	17	11.4282		274.345	608.902	233.83	763	289		0.181	0.006	0.013	0.01	0.037
	BALOCHISTAN	CHAGAI	113810	17	14.9372		322.291	410.587	236.03	881	289		0.196	0.069	0.034	0.021	0.089
	BALOCHISTAN	KALAT	266776	41	15.3687		740.833	400.444	158.12	491	610		0.102	0.076	0.111	0.043	0.007
	BALOCHISTAN	DERA BUGTI	210286	21	9.98641		4973.61	480.728	339.7	8	211		0	0.013	0.006	0.989	0.059
	BALOCHISTAN	GWADAR	206154	28	13.5821		1148.53	398.001	171.53		289		0.055	0.062	0.062		0.052
	BALOCHISTAN	HARNAI	81003.9	12	14.8141		337.746	475.92	207.16	749	289		0.188	0.041	0.048	0.032	0.074
	BALOCHISTAN	LEHRI	95450.8	15	15.7149		717.638	581.204	151.71	413	211		0.118	0.027	0.125	0.065	0.179
Fifth Quantile	SINDH	MATIARI	683189	469	68.6486		429.593	762.928	279.75	585	165		0.503	0.333	0.326	0.369	0.888
	SINDH	DADU	1.53214e+06	798	52.084		515.199	770.487	125.62	597	510		0.37	0.208	0.631	0.239	0.276
	SINDH	UMER KOT	902527	1148	127.198		531.793	999.77	416.35		510		0.708	0.569	0.437		0.671
	SINDH	TANDO ALLAH YAR	685759	336	48.9968		545.742	723.037	278.79		165		0.33	0.215	0.243		0.753
	SINDH	TANDO MUHAMMAD KHAN	627072	523	83.4036		561.383	799.392	282.57		609		0.456	0.423	0.423		0.402
	SINDH	SANGHAR	1.82916e+06	1612	88.1279		366.351	825.57	323.72	391	510		0.716	0.444	0.381	0.641	0.514
	SINDH	MIRPURKHAS	1.35332e+06	1384	102.267		345.22	725.858	435.79	58	323		0.826	0.618	0.298	1	0.791
	SINDH	HYDERABAD	2.05248e+06	1537	74.8852		261.58	649.827	237.75	355	211		0.818	0.5	0.444	0.608	0.828
	SINDH	GHOTKI	1.3089e+06	1110	84.8042		328.192	722.125	157.3	247	510		0.763	0.513	0.77	0.75	0.485
	SINDH	NAUSHAHRO FEROZE	1.50508e+06	883	58.668		287.788	686.083	131.25	124	165		0.645	0.284	0.673	0.836	0.835
	SINDH	KHAIRPUR	2.12563e+06	1610	75.7421		138.373	735.805	150.59	71	211		0.968	0.416	0.756	0.967	0.843
	SINDH	SUKKUR	1.24078e+06	1364	109.931		151.062	681.412	109.33	130	126		1	0.694	0.951	0.945	0.977
	SINDH	LARKANA	1.40202e+06	1253	89.3709		491.525	607.361	111.86	554	86		0.574	0.652	0.895	0.521	0.992
	SINDH	KASHMORE	889334	582	65.4422		189.075	598.105	203.95		323		0.858	0.451	0.451		0.611
	SINDH	JAMSHORO	784284	2157	275.028		784.782	778.742	231.35	560	211		0.874	1	0.965	0.869	1
	SINDH	KARACHI	1.33954e+07	9727	72.6145		255.492	601.687	85.29		211		0.811	0.534	0.916		0.82
	SINDH	JACOBABAD	1.03535e+06	606	58.531		186.722	616.32	123.83	92	323		0.834	0.361	0.708	0.913	0.522
	PUNJAB	BAHAWALNAGAR	2.98399e+06	2604	87.2658		435.398	439.817	348.53	400	609		0.637	0.854	0.34	0.619	0.417
	PUNJAB	BHAKKAR	1.47736e+06	1072	72.5618		486.913	423.174	186.37	478	906		0.472	0.743	0.611	0.51	0.216
	PUNJAB	LAYYAH	1.57837e+06	818	51.8258		541.05	396.154	214.99	374	609		0.354	0.597	0.305	0.423	0.238
	PUNJAB	SIALKOT	3.83281e+06	2834	73.9406		276.558	386.21	253.31	319	610		0.779	0.826	0.416	0.652	0.35
	PUNJAB	ATTOCK	1.82086e+06	860	47.2303		258.363	419.96	136.36	144	510		0.582	0.486	0.513	0.739	0.253
	PUNJAB	RAHIM YAR KHAN	4.46938e+06	2534	56.6969		257.974	429.869	126.07	161	609		0.685	0.604	0.701	0.771	0.261
	PUNJAB	MIANWALI	1.49637e+06	1208	80.7286		379.974	408.361	160.54	66	609		0.669	0.84	0.75	0.978	0.373
	PUNJAB	OKARA	3.16216e+06	1633	51.642		470.272	443.074	226.42	455	165		0.393	0.506	0.291	0.358	0.776
	PUNJAB	KHUSHAB	1.28645e+06	1053	81.8535		420.994	422.283	275.09	492	510		0.629	0.833	0.43	0.554	0.447
	PUNJAB	MANDI BAHAUDDIN	1.62721e+06	1067	65.5723		505.679	453.811	174.33		357		0.417	0.645	0.583		0.537
	PUNJAB	KHANEWAL	2.92192e+06	1893	64.7861		416.272	415.599	190.26	401	357		0.488	0.68	0.493	0.532	0.529
	PUNJAB	PAK PATTAN	1.73031e+06	1744	100.791		480.12	431.606	269.18		357		0.661	0.923	0.576		0.731
	PUNJAB	NANKANA SAHIB	1.75054e+06	1260	71.9776		538.296	414.408	146		357		0.433	0.756	0.729		0.597
	PUNJAB	LODHRAN	1.64624e+06	859	52.1796		328.626	414.814	88.2	405	256		0.496	0.555	0.812	0.402	0.619
	PUNJAB	RAJANPUR	1.55672e+06	2164	139.011		785.31	456.178	183.93		256		0.559	0.965	0.868		0.932
	PUNJAB	SARGODHA	3.7781e+06	3540	93.6979		244.06	438.587	208.66	356	165		0.913	0.895	0.687	0.673	0.94
	PUNJAB	DERA GHAZI KHAN	2.31957e+06	2159	93.0778		376.552	414.125	208.99	193	256		0.74	0.916	0.666	0.858	0.858
	PUNJAB	JHELUM	1.28887e+06	1200	93.1051		355.579	416.585	144.28	416	323		0.771	0.909	0.854	0.63	0.738
	PUNJAB	SAHIWAL	2.60404e+06	2416	92.7789		227.596	438.408	195.97	308	357		0.929	0.881	0.715	0.728	0.701
	PUNJAB	CHINIOT	1.36463e+06	1056	77.3836		315.26	508.072	99.54	97	188		0.724	0.666	0.875	0.934	0.873
	PUNJAB	HAFIZABAD	1.16655e+06	1011	86.6659		526.221	407.963	109.95	184	188		0.527	0.888	0.888	0.815	0.902
	PUNJAB	VEHARI	2.91941e+06	2459	84.2293		250.422	422.5	107.19	400	357		0.85	0.861	0.881	0.597	0.664
	PUNJAB	RAWALPINDI	4.80159e+06	3359	69.956		251.194	418.383	120.62	247	211		0.803	0.729	0.791	0.706	0.813
	PUNJAB	GUJRAT	2.95794e+06	1451	49.0544		176.566	413.691	128.42	0	188		0.795	0.52	0.604		0.708
	PUNJAB	JHANG	2.68573e+06	3592	133.744		233.281	468.661	148.6	454	323		0.976	0.951	0.93	0.717	0.88
	PUNJAB	BAHAWALPUR	3.41503e+06	4405	128.989		265.296	443.095	218.45		211		0.937	0.958	0.805		0.962
	PUNJAB	TOBA TEK SINGH	2.30419e+06	1360	59.0229		164.642	430.053	131.4	0	357		0.897	0.611	0.694		0.477
	PUNJAB	FAISALABAD	7.67477e+06	5370	69.9695		198.37	417.274	115.43	152	86		0.881	0.736	0.826	0.804	0.97
	PUNJAB	NAROWAL	1.78334e+06	1152	64.5979		286.922	354.719	146.12	110	256		0.692	0.791	0.659	0.902	0.686
	PUNJAB	MUZAFFARGARH	3.73168e+06	3527	94.5152		287.401	384.914	162.96		357		0.842	0.93	0.798		0.716
	PUNJAB	MULTAN	4.43058e+06	3846	86.8057		214.403	396.929	140.93	152	188		0.921	0.902	0.833	0.891	0.91
	PUNJAB	GUJRANWALA	4.79815e+06	4363	90.931		171.113	366.175	158.85	193	289		0.952	0.937	0.784	0.826	0.783
	PUNJAB	SHEIKHUPURA	2.90056e+06	1978	68.1936		191.96	366.395	108.26	143	188		0.889	0.798	0.847	0.847	0.85
	PUNJAB	LAHORE	8.87885e+06	6599	74.3227		201.917	395.155	60.22		126		0.905	0.812	0.972		0.947
	PUNJAB	KASUR	3.30447e+06	3276	99.1384		182.554	394.256	140.7	104	165		0.96	0.944	0.861	0.956	0.955
	KHYBER PAKHTUNKHWA	SHANGLA	636603	554	87.0244		1324.23	482.878	313.34		289		0.275	0.784	0.388		0.761
	KHYBER PAKHTUNKHWA	BANNU	1.02151e+06	644	63.0441		410.842	655.094	126.34	646			0.48	0.375	0.743	0.271
	KHYBER PAKHTUNKHWA	TANK	355988	253	71.0697		377.273	804.43	190.9	427	906		0.606	0.319	0.562	0.565	0.208
	KHYBER PAKHTUNKHWA	KARAK	634125	437	68.9139		829.765	542.514	125.89	416	610		0.299	0.562	0.777	0.543	0.32
	KHYBER PAKHTUNKHWA	SWAT	1.85346e+06	752	40.5728		307.641	364.986	259.02	395	289		0.425	0.479	0.222	0.282	0.41
	KHYBER PAKHTUNKHWA	HANGU	472372	340	71.9772		313.805	351.69	75.11	360	609		0.7	0.875	0.944	0.586	0.335
	KHYBER PAKHTUNKHWA	MALAKAND PROTECTED AREA	673300	361	53.6165		335.135	380.074	121.99	520	270		0.519	0.625	0.652	0.293	0.589
	KHYBER PAKHTUNKHWA	MARDAN	2.14337e+06	974	45.4424		260.149	429.899	111.52	315	165		0.543	0.437	0.625	0.467	0.723
	KHYBER PAKHTUNKHWA	CHARSADDA	1.52824e+06	485	31.7359		164.107	438.669	52.83		165		0.614	0.236	0.819		0.582
	KHYBER PAKHTUNKHWA	KOHAT	839270	691	82.3334		138.494	546.565	103.04	153	323		0.992	0.659	0.902	0.88	0.694
	KHYBER PAKHTUNKHWA	NOWSHEHRA_	1.32406e+06	680	51.3572		104.058	469.09	62.91	76	165		0.944	0.458	0.909	0.923	0.768
	KHYBER PAKHTUNKHWA	Peshawar	2.97895e+06	2155	72.3409		123.679	433.867	51.32	0	289		0.984	0.722	0.993		0.679
	GILGIT BALTISTAN	GILGIT	112828	66	58.4961			413.966	113.63		576			0.631	0.763		0.268
	GILGIT BALTISTAN	SKARDU	235153	125	53.1569			413.988	139.61		289			0.576	0.597		0.544
	FATA	FR D.I.KHAN	51950.6	45	86.6208		349.85	712.531	246.82				0.748	0.548	0.527
	FATA	FR TANK	16362.9	20	122.228		349.85	712.531	246.82				0.866	0.75	0.736
	FATA	FR LAKKI MARWAT	12695.3	22	173.292		1165.97	545.255	135.11				0.464	0.979	0.979
	FATA	FR BANNU	15019.5	28	186.424		1165.97	545.255	135.11				0.511	0.986	0.986
	FATA	KHYBER AGENCY	663997	326	49.0966		505.999	404.802	199		366		0.362	0.541	0.333		0.38
	FATA	BAJAUR AGENCY	723150	266	36.7835		566.054	351.664	214.23		270		0.267	0.43	0.229		0.395
	FATA	FR PESHAWAR	59271.4	21	35.4302		257.012	473.904	84.43				0.448	0.243	0.638
	BALOCHISTAN	SIBI	117597	98	83.3352		337.746	475.92	207.16	749	289		0.732	0.77	0.618	0.347	0.746
	BALOCHISTAN	PISHIN	417274	201	48.1697		797.935	275.969	139.4	331	256		0.244	0.763	0.506	0.478	0.559
	BALOCHISTAN	NASIRABAD	267265	141	52.7566		625.26	442.46	154.87	367	256		0.314	0.527	0.5	0.456	0.634
	BALOCHISTAN	KILLA ABDULLAH	409659	135	32.9542		356.691	327.206	217.9	422	256		0.338	0.395	0.215	0.206	0.358
	BALOCHISTAN	QUETTA	853664	1319	154.51		723.443	441.8	143.5	444	289		0.677	0.993	0.958	0.76	0.925
	BALOCHISTAN	JAFFARABAD	464587	298	64.143		363.112	412.593	102.27		289		0.551	0.673	0.84		0.649
	BALOCHISTAN	LASBELA	341698	322	94.2352		378.525	474.949	63.63	255	289		0.755	0.847	1	0.782	0.798
	BALOCHISTAN	NUSHKI	110542	61	55.1825		295.12	382.487	122.89	277	289		0.598	0.638	0.68	0.576	0.567
	AZAD KASHMIR	MUZAFFARABAD	436729	343	78.5383			413.981	280.56		384			0.819	0.395		0.626
	AZAD KASHMIR	POONCH	441179	161	36.4931			413.981	137.73		270			0.312	0.375		0.388
	AZAD KASHMIR	NEELUM	142689	97	67.9799			414.035	202.13		366			0.701	0.486		0.552
	AZAD KASHMIR	HATTIAN	188248	159	84.463			413.981	242.01					0.868	0.52
	AZAD KASHMIR	SUDHNOTI	254781	99	38.8569			414.003	108.39		270			0.347	0.541		0.425
	AZAD KASHMIR	KOTLI	628548	247	39.2969			413.982	108.6		384			0.354	0.555		0.283
	AZAD KASHMIR	BHIMBER	302172	235	77.7702			413.565	178.31		384			0.805	0.645		0.604
	AZAD KASHMIR	HAVELI	130836	85	64.9671			413.911	134.77		384			0.687	0.722		0.5
	AZAD KASHMIR	MIRPUR	261337	192	73.4685			418.214	81.2	316	384			0.777	0.937	0.663	0.574
	AZAD KASHMIR	BAGH	315815	406	128.556			414.008	149.66		270			0.972	0.923		0.917
